# Supplementary material for: The “Dark Side” Effects of Social Capital on Harmful Drinking among Chinese Community Residents: A Multilevel Study
Source: MDPI journal article supplement (doi:10.3390/ijerph15102249), 2018-10-15
Supplement: s1 [file s1]

Supplementary Table 1 CAGE-4 item questionnaire was used to assess harmful drinking.

|                                                                   | <i>Answer</i> |    |
|-------------------------------------------------------------------|---------------|----|
| 1. Have you ever felt the need to cut down on your drinking?      | Yes           | No |
| 2. Have you ever been annoyed by others criticizing your drinking | Yes           | No |
| 3. Have you ever felt guilty about your drinking?                 | Yes           | No |
| 4. Have you ever felt guilty about your drinking?                 | Yes           | No |

Supplementary Table 2 Neighborhood Scales used to assess social cohesion

| <i>Question: 'How satisfied are you with...?'</i>                | <i>Rating</i> |   |   |   |   |
|------------------------------------------------------------------|---------------|---|---|---|---|
| 1. People around here are willing to help their neighbors        | 5             | 4 | 3 | 2 | 1 |
| 2. People in my neighborhood generally get along with each other | 5             | 4 | 3 | 2 | 1 |
| 3. People in my neighborhood can be trusted                      | 5             | 4 | 3 | 2 | 1 |
| 4. People in my neighborhood share the same values               | 5             | 4 | 3 | 2 | 1 |

1=strongly agree, 2=agree, 3=neutral (neither agree nor disagree), 4=disagree, 5=strongly disagree

Supplementary Table 3 Membership in social organizations used in the study

| <i>Question: 'Do you participate in the following organizations?'</i> | <i>Answer</i> |    |
|-----------------------------------------------------------------------|---------------|----|
| 1. Political organizations or associations                            | Yes           | No |
| 2. Industrial or professional groups                                  | Yes           | No |
| 3. Volunteer groups                                                   | Yes           | No |
| 4. Senior citizens' clubs                                             | Yes           | No |
| 5. Religious groups or associations                                   | Yes           | No |
| 6. Neighborhood community associations                                | Yes           | No |

Supplementary Table4 Frequency of social participation used in the study

| <i>Question: 'How satisfied are you with...?'</i>        | <i>Rating</i> |   |   |   |   |
|----------------------------------------------------------|---------------|---|---|---|---|
| 1. Visiting family or friends                            | 5             | 4 | 3 | 2 | 1 |
| 2. Recreational activities involving other people        | 5             | 4 | 3 | 2 | 1 |
| 3. Physical and cultural activities in the neighborhood  | 5             | 4 | 3 | 2 | 1 |
| 4. Attending a series of lectures in the neighborhood    | 5             | 4 | 3 | 2 | 1 |
| 5. Self-management group, mutual-help group              | 5             | 4 | 3 | 2 | 1 |
| 6. Volunteer or charity work                             | 5             | 4 | 3 | 2 | 1 |
| 7. Activities in political organizations or associations | 5             | 4 | 3 | 2 | 1 |
| 8. Dining out or shopping with other people              | 5             | 4 | 3 | 2 | 1 |

1=never, 2=several times per year, 3=several times per month, 4=once per week, and 5=two or more times per week

Supplementary Table 5 WHO-5 Well-Being Index was used to assess mental health

| <i>Question: 'How did you feel at last four weeks?'</i>       | <i>Rating</i> |   |   |   |   |   |
|---------------------------------------------------------------|---------------|---|---|---|---|---|
| 1. I have felt cheerful and in good spirits                   | 5             | 4 | 3 | 2 | 1 | 0 |
| 2. I have felt calm and relaxed                               | 5             | 4 | 3 | 2 | 1 | 0 |
| 3. I have felt active and vigorous                            | 5             | 4 | 3 | 2 | 1 | 0 |
| 4. I woke up feeling fresh and rested                         | 5             | 4 | 3 | 2 | 1 | 0 |
| 5. My daily life has been filled with things that interest me | 5             | 4 | 3 | 2 | 1 | 0 |

0= at no time, 1= some of the time, 2= less than half of the time, 3= more than half of the time, 4= most of the time, 5= all of the time.
